# Supplementary material for: Deletion of ERF and CIC causes abnormal skull morphology and global developmental delay
Source: PubMed Central journal article supplement — Cold Spring Harb Mol Case Stud. 2021 Jun;7(3):a005991. doi: 10.1101/mcs.a005991 (PMC8208047; doi:10.1101/mcs.a005991), 2021-06
Supplement: supp_mcs.a005991_Supplemental_Material.pdf [file supp_mcs.a005991_Supplemental_Material.pdf]

# DELETION OF *ERF* AND *CIC* CAUSES ABNORMAL SKULL MORPHOLOGY AND GLOBAL DEVELOPMENTAL DELAY

Ram Singh<sup>1,2\*</sup>, Ana S. A. Cohen<sup>1,2,a\*</sup>, Cathryn Poulton<sup>3</sup>, Tina Duelund Hjortshøj<sup>4</sup>, Moe Akahira-Azuma<sup>1,b</sup>, Geetu Mendiratta<sup>1,2</sup>, Wahab A. Khan<sup>1,2,c</sup>, Dimitar N. Azmanov<sup>5,6</sup>, Karen J. Woodward<sup>5,6</sup>, Maria Kirchhoff<sup>4</sup>, Lisong Shi<sup>1,2</sup>, Lisa Edelmann<sup>1,2</sup>, Gareth Baynam<sup>7,8,9</sup>, Stuart A. Scott<sup>1,2,d†</sup>, and Ethylin Wang Jabs<sup>1†</sup>

<sup>1</sup> Department of Genetics and Genomic Sciences, Icahn School of Medicine at Mount Sinai, New York, NY.

<sup>2</sup> Sema4, Stamford, CT.

<sup>3</sup> Genetic Service of Western Australia, King Edward Memorial Hospital, Perth.

<sup>4</sup> Department of Clinical Genetics, Copenhagen University Hospital, Rigshospitalet, Denmark.

<sup>5</sup> Department of Diagnostic Genomics, PathWest Laboratory Medicine, QEII Medical Centre, Nedlands 6009, Western Australia.

<sup>6</sup> Pathology and Laboratory Medicine, Medical School, Faculty of Health and Medical Sciences, The University of Western Australia, Crawley 6009, Western Australia.

<sup>7</sup> Western Australian Register of Developmental Anomalies and Genetic Services of Western Australia, King Edward Memorial Hospital, Perth, Western Australia.

<sup>8</sup> Faculty of Health and Medical Sciences, Division of Paediatrics and Telethon Kids Institute, University of Western Australia, Perth, Western Australia.

<sup>9</sup> Faculty of Medicine, University of Notre Dame, Australia, Perth, Western Australia.

\* These authors contributed equally.

## Current affiliations:

<sup>a</sup> Department of Pathology and Laboratory Medicine, Children's Mercy - Kansas City, Kansas City, MO; Center for Pediatric Genomic Medicine, Children's Mercy - Kansas City, Kansas City, MO; University of Missouri-Kansas City School of Medicine, Kansas City, MO.

<sup>b</sup> National Center for Global Health and Medicine, Tokyo, Japan.

<sup>c</sup> Department of Pathology and Laboratory Medicine, Dartmouth-Hitchcock Medical Center, Lebanon, NH.

<sup>d</sup> Department of Pathology, Stanford University, Stanford, CA; Stanford Medicine Clinical Genomics Laboratory, Stanford Health Care, Palo Alto, CA.

## Running Title: *ERF* and *CIC* deletion and abnormal skull morphology

### †CORRESPONDENCE TO:

#### Stuart A. Scott, PhD

Adjunct Associate Professor  
Department of Genetics and Genomic Sciences  
Icahn School of Medicine at Mount Sinai  
New York, NY 10029  
Tel. 212-241-3780  
Fax. 212-241-0139  
E-mail: [sascott@stanford.edu](mailto:sascott@stanford.edu)

#### Ethylin Wang Jabs, MD

Professor  
Department of Genetics and Genomic Sciences  
Icahn School of Medicine at Mount Sinai  
New York, NY 10029  
Tel. 212-241-3504  
Fax. 212-426-9065  
E-mail: [ethylin.jabs@mssm.edu](mailto:ethylin.jabs@mssm.edu)

### SUPPLEMENTAL MATERIAL:

**Supplemental Table S1:**

Page 2

**Supplemental Table S2:**

Page 5

**Supplemental Table S1. Previously reported *ERF* variants implicated in variable craniosynostosis.**

| Nucleotide change | Protein change  | Craniosynostosis type / Phenotype                                                                                                     | Population frequency (gnomAD) | Reference                                              |
|-------------------|-----------------|---------------------------------------------------------------------------------------------------------------------------------------|-------------------------------|--------------------------------------------------------|
| c.1A>T            | p.Met1?         | P + OHT, mild exorbitism, malar hypoplasia, broad thumbs/first toes, early CM (1 pt)                                                  | absent                        | Glass (2019) PMID: 30758909                            |
| c.1A>G            | p.Met1?         | MS + proptosis, hypertelorism, malar hypoplasia, depressed nasal bridge, ectopic posterior pituitary, CM (1 pt)                       | absent                        | Chaudhry (2015) PMID: 26097063                         |
| c.3G>A            | p.Met1?         | MS (4 pts, 1 family)                                                                                                                  | absent                        | Twigg (2013) PMID: 23354439                            |
| c.21A>T           | p.(Thr7=)       | SS (3 pts, 1 family)                                                                                                                  | absent                        | Twigg (2013) PMID: 23354439                            |
| c.23-2A>G         | -               | BI-ME + proptosis, hypertelorism, depressed nasal bridge, speech delay (1 pt)                                                         | absent                        | Chaudhry (2015) PMID: 26097063                         |
| c.90_99del        | p.Trp30Cysfs*44 | SS + developmental delay (1 pt)                                                                                                       | absent                        | Lee (2018) PMID: 29215649                              |
| c.157G>A          | p.Gly53Arg      | SS + OHT, exorbitism, malar hypoplasia, low-set ears, open mouth appearance (1 pt)                                                    | absent                        | Glass (2019) PMID: 30758909                            |
| c.161A>G          | p.Glu54Gly      | UL + medial epicanthic folds, short upturned nose (1 pt); CC-SS, OHT, exorbitism (1 pt, same family)                                  | absent                        | Glass (2019) PMID: 30758909                            |
| c.194G>A          | p.Arg65Gln      | SS (2 pts, 1 family); BI (1 pt)                                                                                                       | absent                        | Twigg (2013) PMID: 23354439; Lee (2018) PMID: 29215649 |
| c.202G>C          | p.Gly68Arg      | SS-UL + hydrocephalus, macrocephaly, dysplastic auricles (1 pt); ME + dysplastic auricles (1 pt, same family); SS (1 pt, same family) | absent                        | Glass (2019) PMID: 30758909                            |
| c.247C>T          | p.Arg83Trp      | CC variable (10 pts, 1 family, with reduced penetrance in 4 pts); SB + OHT, exorbitism (1 pt, different family)                       | absent                        | Glass (2019) PMID: 30758909                            |
| c.248G>A          | p.Arg83Gln      | CC variable + OHT, exorbitism, malar hypoplasia, medial epicanthic folds, CM (2 pts, 1 family)                                        | 1/250822 =0.0004%             | Glass (2019) PMID: 30758909                            |
| c.256C>T          | p.Arg86Cys      | MS (1 pt)                                                                                                                             | absent                        | Twigg (2013) PMID: 23354439                            |
| c.257G>A          | p.Arg86His      | SB + hypertelorism, vertical nasal displacement (2 pts, 1 family)                                                                     | 1/250504 =0.0004%             | Yoon (2019) PMID: 31754721                             |

|                |                   |                                                                                                                                                                                                                                                                                                                                                                  |                                      |                                                                                         |
|----------------|-------------------|------------------------------------------------------------------------------------------------------------------------------------------------------------------------------------------------------------------------------------------------------------------------------------------------------------------------------------------------------------------|--------------------------------------|-----------------------------------------------------------------------------------------|
| c.301C>T       | p.Arg101Trp       | P + OHT, exorbitism, malar hypoplasia, early CM (3 pts, 1 family, with reduced penetrance in other 2 pts)                                                                                                                                                                                                                                                        | 1/251472<br>=0.0004%                 | Glass (2019) PMID: 30758909                                                             |
| c.311A>G       | p.Tyr104Cys       | Multiple congenital anomalies                                                                                                                                                                                                                                                                                                                                    | 1/251472<br>=0.0004%                 | Retterer (2016) PMID: 26633542                                                          |
| c.373+1G>C     | -                 | Crouzon syndrome                                                                                                                                                                                                                                                                                                                                                 | absent                               | Lee (2018) PMID: 29215649                                                               |
| c.383T>G       | p.Val128Gly       | UC + low anterior hairline, asymmetric face, flat malar regions, low-set and posteriorly rotated right ear, normal development (1 pt)                                                                                                                                                                                                                            | 7/241336<br>=0.0029%                 | Topa (2020) PMID: 31837199                                                              |
| c.547C>T       | p.Arg183*         | MS (4 pts, 1 family); SS + OHT, mild exorbitism, malar hypoplasia (1 pt, different family); SB + OHT, mild exorbitism, malar hypoplasia, short lateral metatarsals (3 pts, 1 family, with reduced penetrance in 1 pt)                                                                                                                                            | absent                               | Twigg (2013) PMID: 23354439; Glass (2019) PMID: 30758909                                |
| c.652C>T       | p.Arg218*         | SB + OHT, mild exorbitism (2 pts, 1 family, reduced penetrance in other pt)                                                                                                                                                                                                                                                                                      | 0%                                   | Glass (2019) PMID: 30758909                                                             |
| c.886G>A       | p.Gly296Ser       | SS, hypertelorism, vertical nasal displacement (1pt)                                                                                                                                                                                                                                                                                                             | 5/245366<br>=0.002%;<br>1 homozygous | Yoon (2019) PMID: 31754721                                                              |
| c.891_892del   | p.Gly299Argfs*9   | P (1 pt); M (4 pts, 2 families); B-UL + OHT, exorbitism, malar hypoplasia, early CM (1 pt)                                                                                                                                                                                                                                                                       | absent                               | Twigg (2013) PMID: 23354439; Glass (2019) PMID: 30758909                                |
| c.985_1027del  | p.Arg329Serfs*54  | SS, hypertelorism, frontal bossing, sunken midface, short stature (2 pts, 1 family)                                                                                                                                                                                                                                                                              | absent                               | Yoon (2019) PMID: 31754721                                                              |
| c.1103C>T      | p.Ser368Phe       | UC (1 pt who also carries <i>POR</i> p.Arg453His)                                                                                                                                                                                                                                                                                                                | absent                               | Clarke (2018) PMID: 29168297                                                            |
| c.1201_1202del | p.Lys401Glu fs*10 | P (1 pt); P + OHT, malar hypoplasia, CM, frontal bossing, long philtrum, high arched palate, low-set ears, inverted nipples, bilateral 5th finger clinodactyly, broad DP of halluces, sacral dimple (1 pt, different family); UC + long philtrum, short up-turned nose, joint hypermobility (2 pts, 1 family, with reduced penetrance in other pt); BLSS and SS. | 1/236032<br>=0.0004%                 | Twigg (2013) PMID: 23354439; Glass (2019) PMID: 30758909; Korberg (2020) PMID: 32370745 |
| c.1214G>A      | p.Ser405Asn       | ME (1 pt)                                                                                                                                                                                                                                                                                                                                                        | absent                               | Yoon (2019) PMID: 31754721                                                              |

|                        |                  |                                                                                                                                                                                                                                                                                                                                                                                                                                                                                                                                                                                                                                                     |                   |                                                          |
|------------------------|------------------|-----------------------------------------------------------------------------------------------------------------------------------------------------------------------------------------------------------------------------------------------------------------------------------------------------------------------------------------------------------------------------------------------------------------------------------------------------------------------------------------------------------------------------------------------------------------------------------------------------------------------------------------------------|-------------------|----------------------------------------------------------|
| c.1270C>T              | p.Gln424*        | P (3 pts, 1 family); SB + OHT (1 pt, different family)                                                                                                                                                                                                                                                                                                                                                                                                                                                                                                                                                                                              | absent            | Twigg (2013) PMID: 23354439; Glass (2019) PMID: 30758909 |
| c.1300G>A              | p.Glu434Lys      | UC + high forehead, tendency toward turriccephaly preoperative, prominent scalp veins, shallow orbits, mild right proptosis, flat malar regions, small mouth, hypotelorism, asymmetric facial midline, right epicanthus, flat malar regions, midface hypoplasia, low-set and anteriorly rotated ears and cup-shaped right helix, psychomotor delay, strabismus, tapering fingers, mild skin syndactyly of fingers, short proximal phalanges 2-5, bilateral syndactyly 2nd-3rd toes, overlapping 2nd and 4th toes right foot, clinodactyly 3rd toe, diarrhea, gastroesophageal reflux, food allergy, growth delay, short stature, sparse hair (1 pt) | 3/245440 =0.0012% | Topa (2020) PMID: 31837199                               |
| c.1390_1391dup         | p.Lys465Leufs*67 | P + OHT, exorbitism, malar hypoplasia, left proximal radio-ulnar synostosis, C5/6 vertebral fusion, broad thumbs (1pt); SS + OHT, exorbitism (1 pt, same family)                                                                                                                                                                                                                                                                                                                                                                                                                                                                                    | absent            | Glass (2019) PMID: 30758909                              |
| c.1512del              | p.Phe504Leufs*27 | CC (1 pt)                                                                                                                                                                                                                                                                                                                                                                                                                                                                                                                                                                                                                                           | absent            | Twigg (2013) PMID: 23354439                              |
| c.1593_1594insC<br>AGA | p.Ser532Glnfs*3  | ME (3 pts, 1 fam)                                                                                                                                                                                                                                                                                                                                                                                                                                                                                                                                                                                                                                   | absent            | Timberlake (2017) PMID: 28808027                         |

BI: bicoronal; BLSS: bilateral lambdoid and sagittal synostosis; CC: complex craniosynostosis; CM: Chiari-1 malformation; ME: metopic; MS: multiple-suture synostosis; OHT: orbital hypertelorism; P: pansynostosis; pt(s): patient(s); SB: Sagittal bilambdoid; SS: sagittal synostosis; UC: unicoronal; UL: unilambdoid. All variants described for *ERF* (NM\_006494.3) in HGMD® Professional 2021.1 with the exception of c.266A>G, c.288G>T and c.1460G>A associated with distinct phenotypes; variants frequencies from <https://gnomad.broadinstitute.org/>.

**Supplemental Table S2. Previously reported *CIC* sequence variants implicated in neurodevelopmental phenotypes (mostly *de novo*).**

| Nucleotide change   | Protein change    | Phenotype                                                                                              | Population frequency (gnomAD) | Reference                                                         |
|---------------------|-------------------|--------------------------------------------------------------------------------------------------------|-------------------------------|-------------------------------------------------------------------|
| c.457C>T            | p.Leu153Phe       | ASD (1/2,508 pts)                                                                                      | absent                        | Iossifov (2014) PMID: 25363768                                    |
| c.673C>T            | p.Gln225*         | ASD + CLP (1/2,620 pts)                                                                                | absent                        | Yuen (2017) PMID: 28263302                                        |
| c.680A>G            | p.Asn227Ser       | nsID (1/236 pts)                                                                                       | absent                        | Athanasakis (2014) PMID: 24307393                                 |
| c.791A>G            | p.His264Arg       | Schizophrenia (1/623 pts)                                                                              | absent                        | Fromer (2014) PMID: 24463507                                      |
| c.820C>T            | p.Arg274*         | ASD (1/2,508 pts)                                                                                      | 1/246948 =0.0004%             | Iossifov (2014) PMID: 25363768; PMID: 28191890 uses same data set |
| c.1057C>T           | p.Arg353*         | DD, ID, ASD, seizures, macrocephaly, abnormal MRI, mild telangiectasia (1 pt)                          | absent                        | Lu (2017) PMID: 28288114                                          |
| c.1474C>T           | p.Arg492Trp       | nsID (1/10 pts)                                                                                        | 1/250214 =0.0004%             | Vissers (2010) PMID: 21076407                                     |
| c.1801_1808 dup     | p.Glu604Argfs*127 | DD, ID, seizures (2 siblings) + pulmonary stenosis (sib A) + heart murmur, mild telangiectasia (sib B) | absent                        | Lu (2017) PMID: 28288114                                          |
| c.1927G>C           | p.Gly643Arg       | ASD, DD (3 affected siblings, variable severity)                                                       | absent                        | Mahfouz (2020) PMID: 32382396                                     |
| c.2571_2578 delinsC | p.Thr859Alafs*63  | DD, ID, ASD, abnormal MRI, mild hypotonia (1 pt)                                                       | absent                        | Lu (2017) PMID: 28288114                                          |
| c.2974C>T           | p.Gln992*         | DD, ID, ASD, ADHD, abnormal MRI, marfanoid habitus, stereotypic movements (1 pt)                       | absent                        | Lu (2017) PMID: 28288114                                          |
| c.3795+1G>C         | -                 | nsID (1/108 pts)                                                                                       | absent                        | Kim (2019) PMID: 30952489                                         |

ASD: autism spectrum disorder; CLP: cleft lip and palate; DD: developmental delay; ID: intellectual disability; MRI: magnetic resonance imaging; nsID: nonsyndromic intellectual disability; pt(s): patient(s). All variants described for *CIC* (NM\_015125.4) in HGMD® Professional 2021.1; variants frequencies from <https://gnomad.broadinstitute.org/>.
